# Supplementary material for: Berberine mitigates intracerebral hemorrhage-induced neuroinflammation in a gut microbiota-dependent manner in mice
Source: publisher site journal article supplement (doi:10.18632/aging.204642), 2023-04-07
Supplement: Supplementary file [file aging-v15i7-204642-supplementary-material-SD1.pdf]

## SUPPLEMENTARY FIGURE

### Experimental design and animal groups

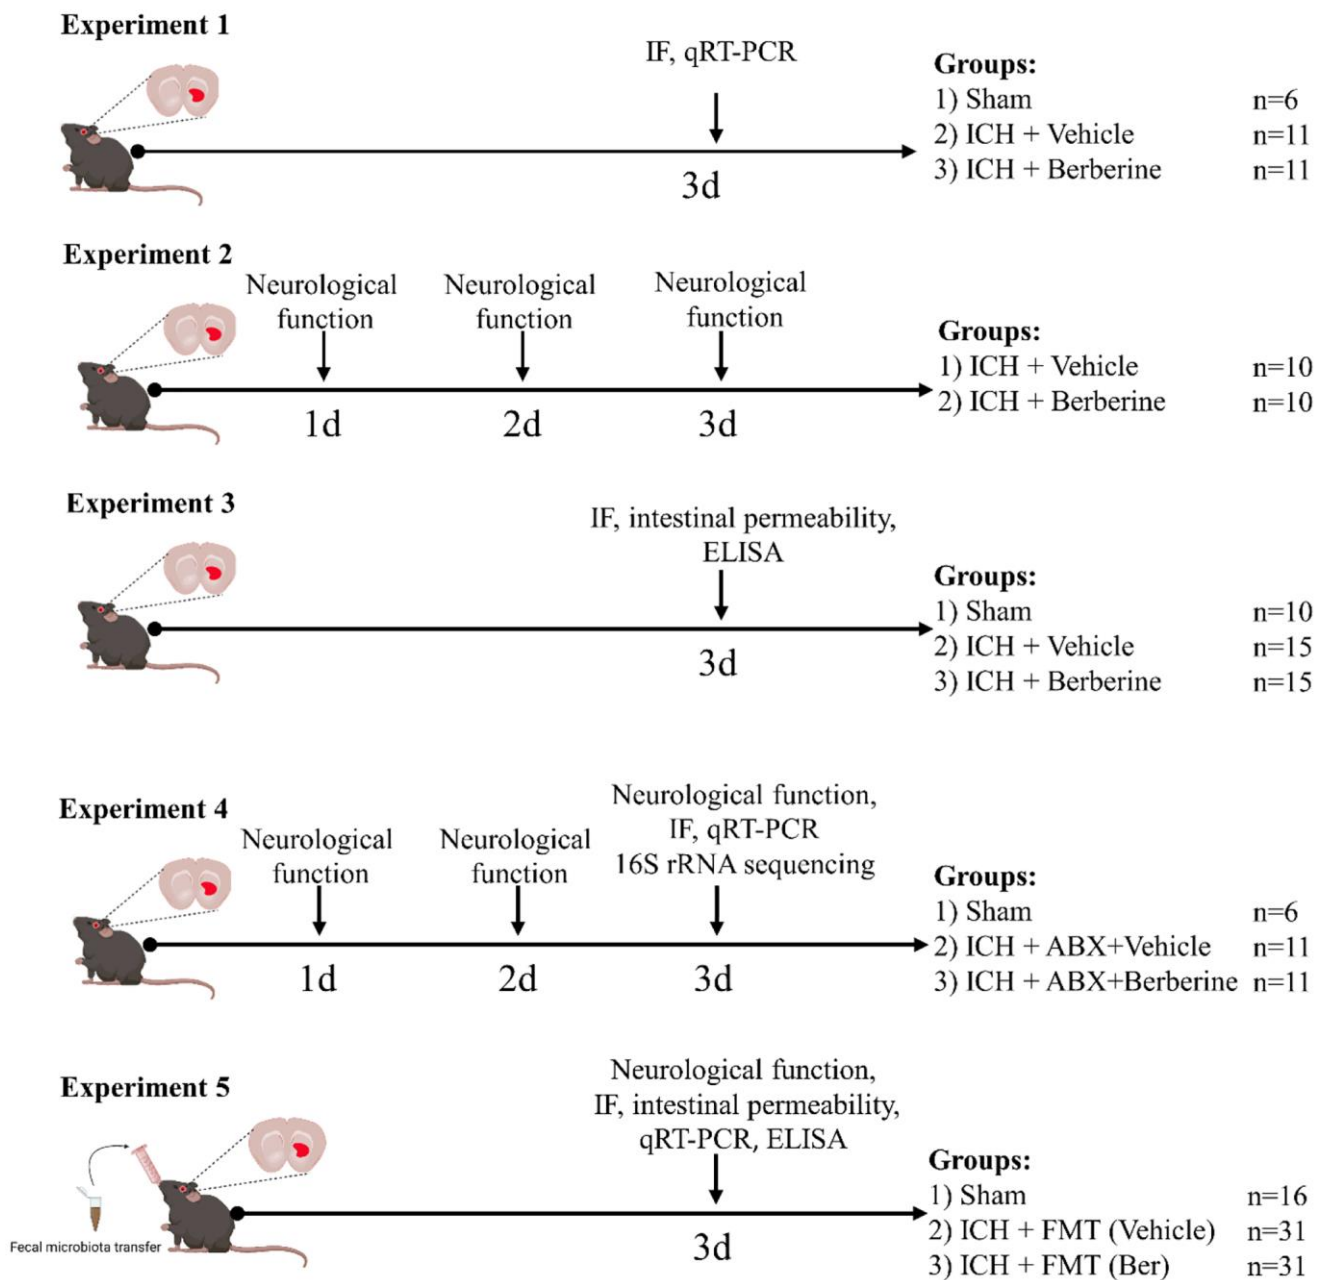

Supplementary Figure 1. The experimental design schematic, drug dosages, and animal groups (Part Figure was created with [BioRender.com](https://www.biorender.com)).
